# Supplementary material for: Characteristics and contributing factors related to sports injuries in young volleyball players
Source: PubMed Central journal article supplement (PMC4015734; doi:10.1186/1756-0500-6-415), 2013-10-14
Supplement: 1756-0500-6-415-S1.pdf [file 1756-0500-6-415-S1.pdf]

**Additional file 1: Appendix. Reported Condition Inquiry**

Identification: Gender: ( ) Male ( ) Female  
 Date of birth:  
 Height: Weight: BMI:  
 City:  
 Duration of Training: Hours of practice per week:

Have you changed your training routine at any time in the current season due to an injury suffered during the practice of the sport?  
 ( ) Yes ( ) No

If you answered **Yes**,  
 Fill in the following chart on the characteristics of the injury/injuries (anatomic site, mechanism and moment of injury), with the respective numeric identification listed in the second chart.

**Characteristics of Injury/Injuries**

|                             | 1 <sup>st</sup> | 2 <sup>nd</sup> | 3 <sup>rd</sup> | 4 <sup>th</sup> | 5 <sup>th</sup> |
|-----------------------------|-----------------|-----------------|-----------------|-----------------|-----------------|
| <b>A – Anatomic site</b>    |                 |                 |                 |                 |                 |
| <b>B – Injury mechanism</b> |                 |                 |                 |                 |                 |
| <b>C – Moment of injury</b> |                 |                 |                 |                 |                 |

**Codes for Variables**

| <b>A – Anatomic site</b> | <b>B – Injury mechanism</b> | <b>C – Moment of injury</b> |
|--------------------------|-----------------------------|-----------------------------|
| 1 – Shoulder             | 1 – Direct contact          | 1 – Training                |
| 2 – Arm                  | 2 – Contactless             | 2 – Competition             |
| 3 – Elbow                | 3 – Overuse                 |                             |
| 4 – Forearm              |                             |                             |
| 5 – Wrist                |                             |                             |
| 6 – Hand                 |                             |                             |
| 7 – Anterior thigh       |                             |                             |
| 8 – Posterior thigh      |                             |                             |
| 9 – Knee                 |                             |                             |
| 10 – Leg                 |                             |                             |
| 11 – Calf                |                             |                             |
| 12 – Ankle               |                             |                             |
| 13 – Foot                |                             |                             |
| 14 – Thorax              |                             |                             |
| 15 – Abdomen             |                             |                             |
| 16 – Head                |                             |                             |
| 17 – Cervical spine      |                             |                             |
| 18 – Lumbar spine        |                             |                             |
| 19 – Pelvic girdle       |                             |                             |
| 20 – Other               |                             |                             |

Comment: (B – annotate action involved)

**OBS:** \_\_\_\_\_  
\_\_\_\_\_  
\_\_\_\_\_
